# Supplementary material for: Covalent RGD–graphene–phthalocyanine nanocomposite for fluorescence imaging-guided dual active/passive tumor-targeted combinatorial phototherapy
Source: Royal Society of Chemistry journal article supplement (doi:10.1039/d1tb02254g), 2021-12-09
Supplement: d1tb02254g1.pdf [file d1tb02254g1.pdf]

## Covalent RGD-Graphene-Phthalocyanine Nanocomposite for Fluorescence Imaging-Guided Dual Active/Passive Tumor Targeted Combinatorial Phototherapy

Ancheng Ouyang,<sup>a</sup> Dongmu Zhao,<sup>a</sup> Xianglei Wang,<sup>a</sup> Wei Zhang,<sup>a</sup> Tianyu Jiang<sup>\*b</sup>

Aiying Li,<sup>\*b</sup> Wei Liu<sup>\*a</sup>

<sup>a</sup>*Institute of Crystal Materials, State Key Laboratory of Crystal Materials, Shandong University, Jinan 250100, China.*

<sup>b</sup>*Helmholtz International Lab for Anti-Infectives, Shandong University–Helmholtz Institute of Biotechnology, State Key Laboratory of Microbial Technology, Shandong University, Qingdao - 266237, P.R. China*

**Synthesis of SiPc-NH<sub>2</sub>.**<sup>1</sup> Silicon phthalocyanine dichloride (SiPcCl<sub>2</sub>) (0.327 mM), 2-(2-aminoethoxy)ethanol (16.4 mM), K<sub>2</sub>CO<sub>3</sub> (3.62 mM), and pyridine (3 mL) were dissolved in 40 mL of dry toluene. The mixture was stirred at 130°C for 15 h under nitrogen flow. After the mixture was evaporated on a rotary evaporator, it was redissolved in chloroform and filtered (150 mL). The filtrate was washed three times with deionized water. Then the crude product was recrystallized from chloroform/n-hexane to obtain SiPc-NH<sub>2</sub> as a green solid. <sup>1</sup>H NMR (CD<sub>3</sub>OD, 300 MHz):  $\delta$  -1.87 (4H, t,  $J$  = 3.4 Hz, CH<sub>2</sub>), 0.54 (4H, t,  $J$  = 3.6 Hz, CH<sub>2</sub>), 1.72 (4H, t,  $J$  = 3.6 Hz, CH<sub>2</sub>), 1.81 (4H, t,  $J$  = 3.8 Hz, CH<sub>2</sub>), 8.43–8.46 (8H, m, Pc-H), 9.68–9.70 (8H, m, Pc-H).

1. J. Pan, A. Ouyang, W. Fang, G. Cheng, W. Liu, F. Wang, D. Zhao, K. Le and J. Jiang, *J Mater Chem B*, 2020, **8**, 2895-2908.
